# Supplementary material for: Bioactive cell niche mediating uniform thermal stimulus for BMSC neural differentiation through TRPV1 channel activation
Source: Royal Society of Chemistry journal article supplement (doi:10.1039/d3tb01049j), 2023-01-01
Supplement: d3tb01049j1.pdf [file d3tb01049j1.pdf]

## Supporting information

# Bioactive cell niche mediating uniform thermal stimulus for BMSCs neural differentiation through TRPV1 channel activation

Dan Wei<sup>a</sup>, Mingze Zeng<sup>a</sup>, Borui Su<sup>a</sup>, Yusheng Zhang<sup>a</sup>, Kai Wu<sup>a</sup>, Ting Zhou<sup>a</sup>, Chengheng Wu<sup>a, b</sup> Jing Sun<sup>a</sup>, Hongsong Fan<sup>a, \*</sup>

<sup>a</sup> National Engineering Research Center for Biomaterials, College of Biomedical Engineering, Sichuan University, Chengdu 610064, Sichuan, China

<sup>b</sup> Institute of Regulatory Science for Medical Devices, Sichuan University, Chengdu 610065, Sichuan, China

\* Corresponding author

E-mail addresses: hsfan@scu.edu.cn (H.-S. Fan)

Table S1. Composition of various hydrogels

| Samples | Collagen concentration (mg/mL) | Modified HA           |              |              |
|---------|--------------------------------|-----------------------|--------------|--------------|
|         |                                | Concentration (mg/mL) | DS of MA (%) | DS of DA (%) |
| CHM     | 4                              | 1                     | 41           | 0            |
| CHD-L   | 4                              | 1                     | 0            | 11           |
| CHD-M   | 4                              | 1                     | 0            | 17           |
| CHD-H   | 4                              | 1                     | 0            | 24           |

Table S2 Primers of neuro-related genes

| Gene   | Primers                   |                           |
|--------|---------------------------|---------------------------|
| MAP-2  | F: GCAAAGTAAGCCTGGTGA     | R: ATCTAAGGGAAGAGTGAAAC   |
| NF-L   | F: TGGAGAATGAGCTGAGAAGC   | R: TTCGTAGCCTCAATGGTCTC   |
| Nestin | F: GGGCAAGTGGAAACGTAGA    | R: TCCCACCGCTGTTGATTT     |
| NSE    | F: TGGATGTGGCTGCCTCTG     | R: TCCTGGTCGAATGGGTCT     |
| Tuj1   | F: GCCTGACAAC TTTATCTTCGG | R: CATTGAGCTGACCAGGGAAT   |
| TRPV1  | F: CACAGAGTGGACCCAGATACG  | R: CACTCGAGATAGACATGCCACC |
| GFAP   | F: ACATCGAGATCGCCACCTAC   | R: ACATCACATCCTTGTGCTCC   |
| GAPDH  | F: GCCAAAAGGGTCATCATCTCTG | R: CATGCCAGTGAGCTTCCCCT   |

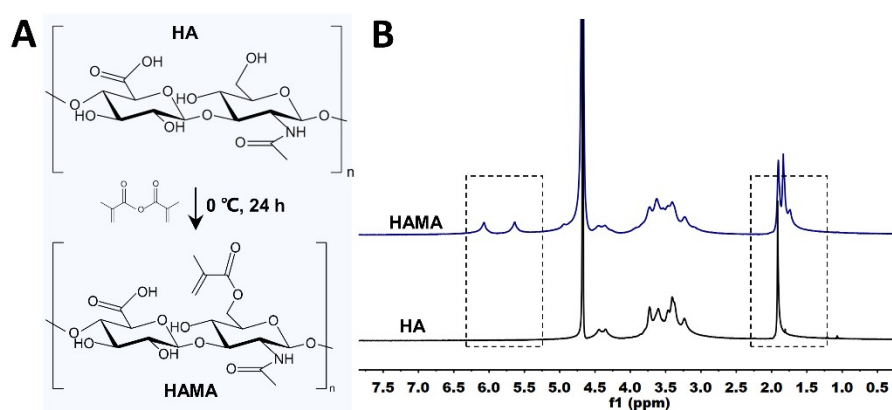

Figure S1. (A) Synthesis route and chemical structure of MA-modified HA (HAMA). (B) <sup>1</sup>H NMR spectra of HA and HAMA. <sup>1</sup>H NMR spectrum of HAMA exhibited peaks of vinyl methylene ( $\delta$  6.1 and  $\delta$  5.6) and methyl protons ( $\delta$  1.8), respectively. The DS of methacrylation group of HAMA was roughly 41%.

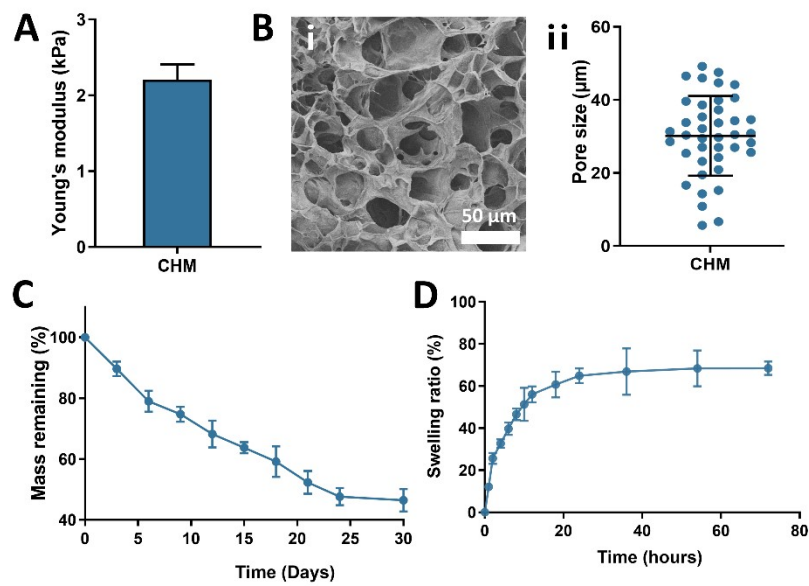

Figure S2. (A) Young's modulus of CHM hydrogel ( $2.22 \pm 0.20$  kPa). (B) SEM image (i) and pore size (ii) of CHM hydrogel. (C) Degradation behaviors of CHM hydrogel. (D) Swelling behavior of CHM hydrogel. (n=5)

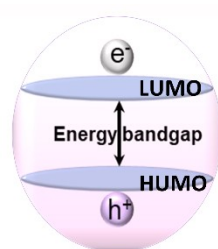

Figure S3. Schematic illustration of photothermal polymeric material.

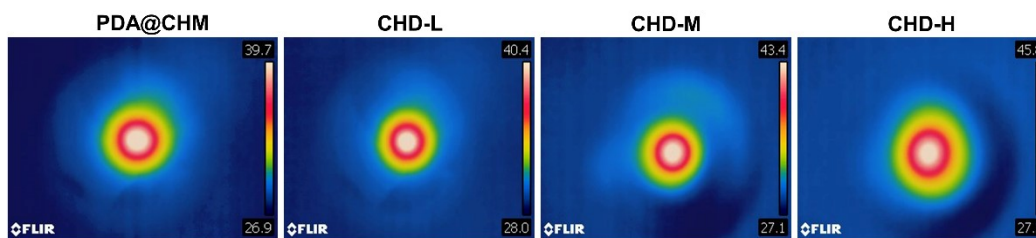

Figure S4. Thermal infrared images of PDA@CHM and CHD hydrogels (CHD-L, CHD-M, CHD-H).

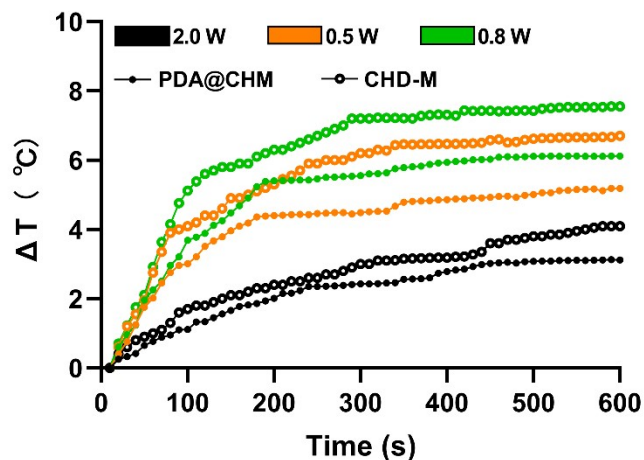

Figure S5. Temperature change curves of PDA@CHM hydrogel and CHD-M hydrogel with different NIR power.

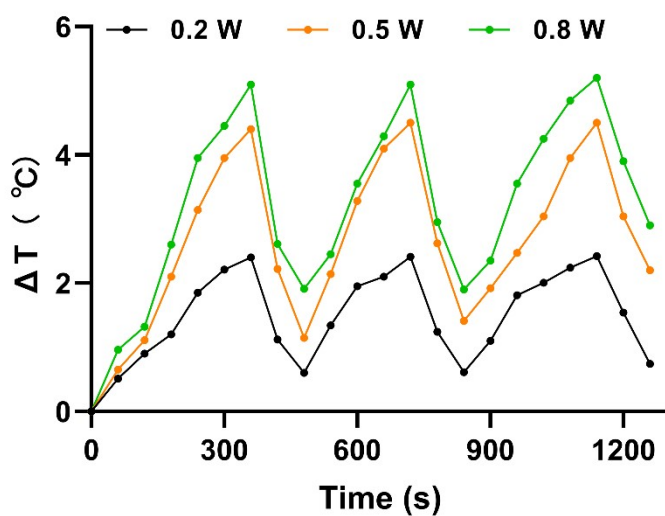

Figure S6. Temperature change curves of PDA@CHM hydrogel with different NIR power over three cycles of different laser irradiation on/off.

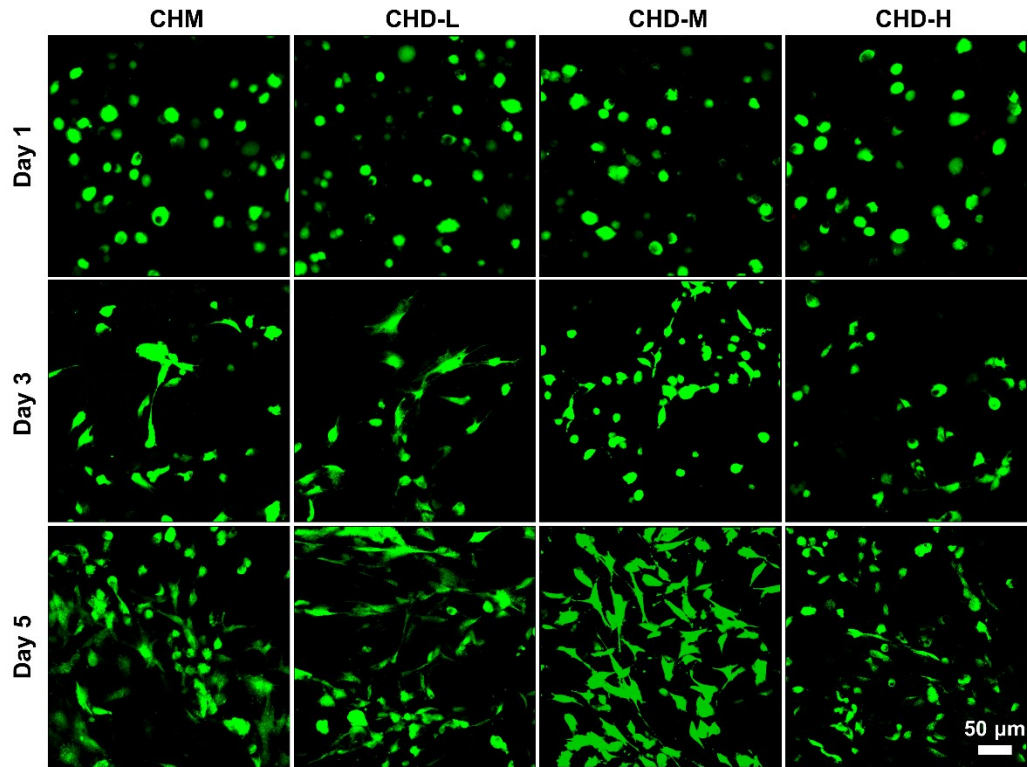

Figure S7. Representative CLSM images of FDA (green)/PI (red) co-staining of BMSCs in CHM, CHD-L, CHD-M and CHD-H hydrogel after 5 days of culture.

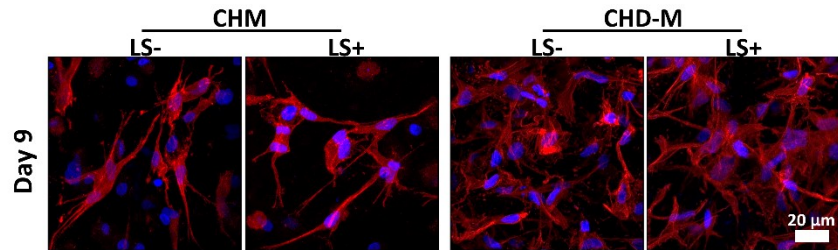

Figure S8. CLSM images of cytoskeleton (red) / nucleus (blue) co-staining of BMSCs in CHM and CHD-M hydrogel under NIR after 9 days.

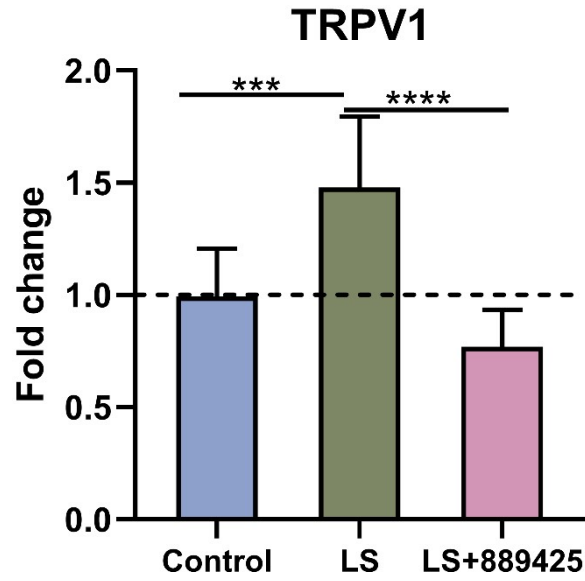

Figure S9. The gene expression of TRPV1 of BMSCs in CHD-M hydrogel with or without 889425 treatment.
